# Supplementary material for: Strain-induced crystallization behaviour of natural rubbers from guayule and rubber dandelion revealed by simultaneous time-resolved WAXD/tensile measurements: indispensable function for sustainable resources
Source: Royal Society of Chemistry journal article supplement (doi:10.1039/c6ra22455e), 2016-01-01
Supplement: c6ra22455e1.pdf [file c6ra22455e1.pdf]

## Supporting information for the manuscript

Strain-Induced Crystallization Behaviours of Natural Rubbers from Guayule and Rubber Dandelion Revealed by Simultaneous Time-Resolved WAXD/Tensile Measurements: Indispensable Function for Sustainable Resources

Yuko Ikeda<sup>a\*</sup>, Preeyanuch Junkong<sup>b</sup>, Takumi Ohashi<sup>b</sup>, Treethip Phakkeeree<sup>b</sup>, Yuta Sakaki<sup>b</sup>, Atitaya Tohsan<sup>c</sup>, Shinzo Kohjiya<sup>d</sup> and Katrina Cornish<sup>e</sup>

<sup>a</sup>*Faculty of Molecular Chemistry and Engineering, Kyoto Institute of Technology, Matsugasaki, Sakyo, Kyoto 606-8585, Japan*

<sup>b</sup>*Graduate School of Science and Technology, Kyoto Institute of Technology, Matsugasaki, Sakyo, Kyoto 606-8585, Japan*

<sup>c</sup>*Department of Materials and Production Technology Engineering, Faculty of Engineering, King Mongkut's University of Technology North Bangkok, Pracharat 1 Rd, Wongsawang, Bangsue, Bangkok 10800, Thailand*

<sup>d</sup>*Professor Emeritus of Kyoto University, 7-506, Onawaba-cho 6, Umezu, Ukyo-ku, Kyoto 615-0925, Japan*

<sup>e</sup>*Departments of Food, Agricultural and Biological Engineering, and Horticulture and Crop Science, Ohio Agricultural Research and Development Center (OARDC), The Ohio State University, Wooster, OH 44691, U. S. A.*

\*Corresponding author

E-mail: [yuko@kit.ac.jp](mailto:yuko@kit.ac.jp).

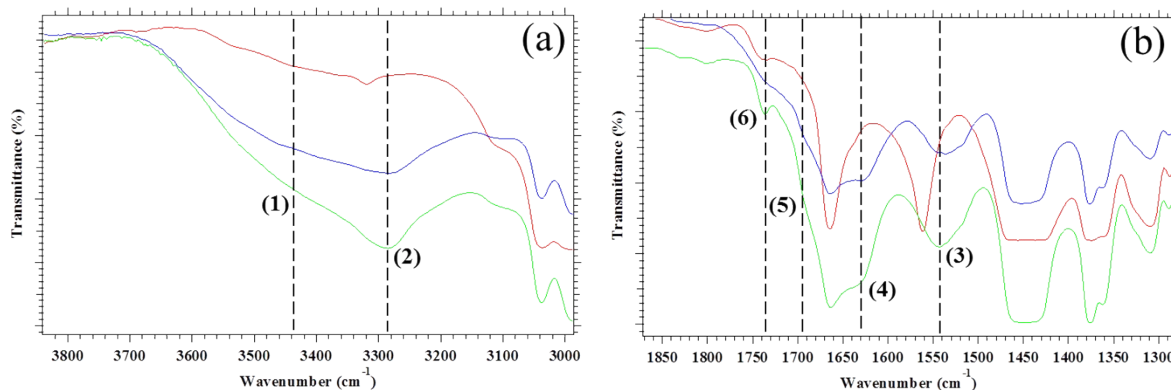

**Figure S1** FT-IR spectra of the purified guayule (—), rubber dandelion (—) and *Hevea* (—) natural rubbers after acetone purifications in the transmittance mode at r.t. in the range of (a) 3800 – 3000  $\text{cm}^{-1}$  and (b) 1850 – 1300  $\text{cm}^{-1}$ . (1) 3450  $\text{cm}^{-1}$  (O-H symmetrical stretching), (2) 3280  $\text{cm}^{-1}$  (N-H symmetrical stretching of secondary amide), (3) 1544  $\text{cm}^{-1}$  (N-H bending of mono-substituted amide II), (4) 1622  $\text{cm}^{-1}$  (N-H bending of mono-substituted amide I), (5) 1694  $\text{cm}^{-1}$  (C=O asymmetrical stretching of dimer of acid and (6) 1738  $\text{cm}^{-1}$  (C=O asymmetrical stretching of ester).

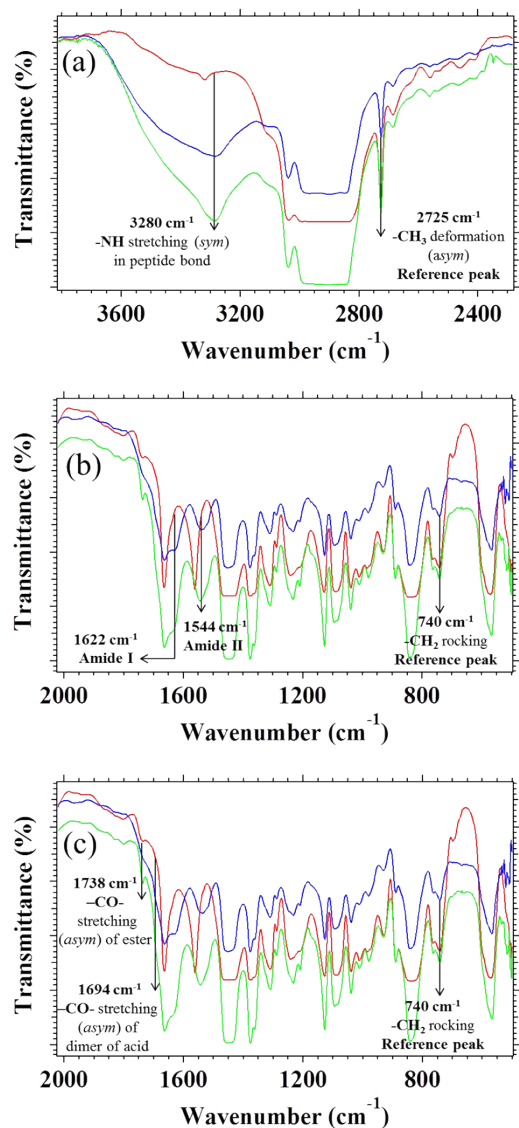

**Figure S2** FT-IR spectra of the purified guayule (—), rubber dandelion (—) and *Hevea* (—) natural rubbers in the transmittance mode for semi-quantitative analyses under the base line (a) *ca.*3700 – *ca.*2360  $\text{cm}^{-1}$  for calculating the relative intensities of N-H stretching in peptide bond using a peak at 2725  $\text{cm}^{-1}$  ( $\text{CH}_3$  asymmetrical deformation) as a reference, (b) *ca.*1920 – *ca.*705  $\text{cm}^{-1}$  for calculating the relative intensities of N-H bending in amide I, amide II using a peak at 740  $\text{cm}^{-1}$  ( $\text{CH}_2$  rocking) as a reference and (c) *ca.*1920 – *ca.*705  $\text{cm}^{-1}$  for calculating the relative intensities of C=O stretching in acid and ester using peak at 740  $\text{cm}^{-1}$  ( $\text{CH}_2$  rocking) as a reference.
